# Supplementary material for: Novel Chimeric Vaccine Candidate Development against Leptotrichia buccalis
Source: MDPI journal article supplement (doi:10.3390/ijerph191710742), 2022-08-29
Supplement: s1 [file s1]

**Table S1.** Top 20 docked solutions of vaccine and MHC-I obtained from PATCHDOCK server. The solutions are ranked as per docking score. In the table, ACE is the atomic contact energy.

| Solution No | Score | Area    | ACE    | Transformation                        |
|-------------|-------|---------|--------|---------------------------------------|
| 1           | 19262 | 2648.20 | 392.23 | -2.52 0.35 1.59 37.40 -55.71 -37.09   |
| 2           | 18818 | 2398.60 | 488.08 | 0.69 0.30 -0.36 0.47 40.31 46.08      |
| 3           | 18664 | 2783.90 | 128.22 | 1.36 -0.70 0.21 -39.65 20.11 75.62    |
| 4           | 18330 | 2593.20 | 12.22  | 0.77 1.04 1.59 14.49 21.94 47.35      |
| 5           | 17254 | 2642.40 | 278.02 | -0.20 -0.72 1.35 -8.93 -11.43 66.25   |
| 6           | 17216 | 2782.60 | 307.37 | 0.93 0.34 -0.25 -5.46 31.63 48.15     |
| 7           | 17168 | 2659.50 | 496.84 | -2.55 -0.74 -1.61 -43.81 108.70 75.91 |
| 8           | 17148 | 2573.50 | 215.58 | 1.12 -0.89 2.93 49.53 2.93 98.67      |
| 9           | 17058 | 2311.60 | 359.63 | -0.42 -0.81 1.15 -16.78 -1.81 68.51   |
| 10          | 16944 | 2584.20 | 265.83 | 1.94 0.64 -1.82 27.07 92.54 61.22     |
| 11          | 16842 | 2294.90 | 139.22 | -2.61 -0.41 2.54 75.85 4.91 31.09     |
| 12          | 16838 | 2474.40 | 462.50 | 2.72 -0.59 0.54 -3.88 -32.91 68.06    |
| 13          | 16794 | 3164.10 | 344.40 | 1.25 -0.22 3.10 45.71 -13.47 52.82    |
| 14          | 16784 | 2971.90 | -19.26 | -2.32 -1.09 1.17 17.83 -21.05 -13.41  |
| 15          | 16752 | 2965.00 | 424.57 | 2.00 0.33 0.88 -38.50 -101.70 11.92   |
| 16          | 16748 | 2641.40 | 484.22 | -3.00 0.42 -2.58 60.71 91.22 17.54    |
| 17          | 16738 | 2478.20 | 336.75 | -2.48 -0.48 1.42 23.11 -62.30 -12.00  |
| 18          | 16672 | 2816.90 | 406.61 | -0.32 -0.51 -2.41 54.73 10.54 59.84   |
| 19          | 16656 | 2406.10 | 80.53  | 1.20 1.08 -2.09 25.37 49.08 28.72     |
| 20          | 16618 | 2056.10 | 406.89 | 0.19 -0.45 -0.96 2.85 58.26 16.00     |

**Table S2.** Top 20 docked solutions of vaccine and MHC-II obtained from PATCHDOCK server. The solutions are ranked as per docking score. In the table, ACE is the atomic contact energy.

| Solution No | Score | Area    | ACE     | Transformation                        |
|-------------|-------|---------|---------|---------------------------------------|
| 1           | 22148 | 3140.50 | 72.18   | -1.06 0.79 -2.16 118.07 107.10 -76.91 |
| 2           | 20942 | 3097.70 | 224.01  | -2.09 0.67 1.70 129.18 69.53 -64.43   |
| 3           | 20484 | 2587.30 | 188.46  | -1.82 0.51 1.52 109.80 52.71 -64.59   |
| 4           | 19668 | 4061.10 | 363.57  | -2.24 -0.16 2.55 194.71 50.98 -11.14  |
| 5           | 19032 | 3754.70 | -10.82  | -1.61 0.22 2.54 155.80 74.82 -40.62   |
| 6           | 18604 | 2719.10 | 297.63  | 0.09 -0.01 -1.43 142.25 139.09 -31.36 |
| 7           | 18470 | 2979.90 | -20.72  | -2.17 -0.69 -1.95 86.01 139.46 21.40  |
| 8           | 18256 | 2448.90 | 328.32  | 0.06 0.73 -1.07 164.73 89.79 -12.07   |
| 9           | 18210 | 3632.10 | -101.67 | -2.12 -0.45 1.36 110.86 25.49 1.57    |
| 10          | 17224 | 3549.80 | 429.31  | 3.00 -1.51 -2.11 72.85 59.68 43.56    |
| 11          | 17060 | 2263.10 | 287.00  | 3.04 1.19 -2.00 65.68 127.56 13.44    |
| 12          | 17034 | 2453.20 | 339.36  | 1.74 -0.82 -0.78 88.75 88.05 81.93    |
| 13          | 17008 | 2556.00 | 276.98  | 1.19 0.43 1.06 38.33 30.46 3.29       |
| 14          | 16744 | 3265.10 | -251.28 | -1.74 -0.74 -1.69 91.31 142.27 14.61  |
| 15          | 16398 | 3126.90 | -77.10  | -1.26 0.95 -2.34 99.15 99.38 -80.30   |
| 16          | 16282 | 3598.20 | 251.66  | -2.52 0.03 -1.97 106.95 110.24 -18.29 |
| 17          | 16222 | 2635.10 | 332.61  | 3.06 -0.50 1.64 161.45 21.85 33.60    |
| 18          | 16220 | 2160.00 | 303.70  | -3.00 0.08 2.69 178.71 90.45 -8.86    |
| 19          | 16178 | 2732.90 | 357.21  | 2.09 0.04 1.39 145.08 6.45 50.75      |
| 20          | 16150 | 2626.10 | 53.88   | -1.69 0.63 1.40 97.94 64.02 -74.42    |

**Table S3.** Top 20 docked solutions of vaccine and TLR-4 obtained from PATCHDOCK server. The solutions are ranked as per docking score. In the table, ACE is the atomic contact energy.

| Solution No | Score | Area    | ACE    | Transformation                        |
|-------------|-------|---------|--------|---------------------------------------|
| 1           | 25398 | 4819.20 | 361.95 | -0.83 0.59 -0.05 -62.63 9.72 -60.32   |
| 2           | 22582 | 3139.00 | 388.72 | -0.90 0.57 0.04 -65.77 3.90 -57.50    |
| 3           | 19442 | 3353.20 | 125.58 | 1.59 1.16 1.82 7.55 -45.05 -102.59    |
| 4           | 19292 | 2847.30 | 107.04 | 1.24 1.19 2.21 20.06 -37.38 -108.00   |
| 5           | 18032 | 2590.80 | 432.37 | 2.43 -0.14 2.81 -33.25 33.45 3.91     |
| 6           | 17924 | 2850.10 | 458.75 | 0.59 1.00 0.18 -93.08 13.00 -39.17    |
| 7           | 17702 | 3485.10 | 345.96 | 1.56 1.34 1.79 -0.77 -30.67 -113.46   |
| 8           | 17292 | 2745.30 | 346.02 | 0.27 -0.49 -2.70 90.14 15.40 -16.35   |
| 9           | 17096 | 3720.90 | 18.04  | 0.88 0.09 -0.11 -13.18 13.14 13.91    |
| 10          | 17066 | 3101.40 | 77.31  | 0.44 0.01 1.43 -46.56 -50.71 -2.30    |
| 11          | 16928 | 2216.10 | 477.71 | 2.78 -0.25 2.72 40.94 -2.21 -32.96    |
| 12          | 16780 | 2792.30 | 211.54 | -2.44 -0.37 -2.06 -2.04 137.36 -45.66 |
| 13          | 16664 | 3325.00 | 324.35 | 2.81 0.62 2.53 34.89 -27.23 -20.69    |
| 14          | 16634 | 2639.40 | 430.77 | -2.02 -0.30 2.41 19.63 -30.53 -16.00  |
| 15          | 16446 | 2868.40 | 293.90 | 1.33 -0.79 2.69 -66.25 13.22 -26.58   |
| 16          | 16442 | 4321.80 | 418.21 | -0.92 0.53 -0.12 -62.94 6.71 -59.02   |
| 17          | 16336 | 3738.60 | 447.77 | -2.59 0.48 -1.41 -60.17 50.61 -46.66  |
| 18          | 16200 | 2740.90 | 238.73 | 0.98 1.35 2.25 5.53 -24.85 -117.40    |
| 19          | 16186 | 2794.50 | 89.17  | -1.75 0.06 1.62 19.63 -6.02 -99.64    |
| 20          | 16174 | 2797.40 | 409.05 | 2.01 -0.50 0.46 -44.82 -39.20 -17.03  |
